# Supplementary material for: Orally administered octacosanol improves liver insulin resistance in high-fat diet-fed mice through the reconstruction of the gut microbiota structure and inhibition of the TLR4/NF-κB inflammatory pathway
Source: Royal Society of Chemistry journal article supplement (doi:10.1039/d2fo02463b), 2022-12-07
Supplement: d2fo02463b1.pdf [file d2fo02463b1.pdf]

Supplementary table 1 The configuration of stock solution in simulated gastrointestinal tract

|                                                   | Stock solution volume (mL) | Storage solution concentration (g/L) |
|---------------------------------------------------|----------------------------|--------------------------------------|
| KCl                                               | 250                        | 37.3                                 |
| KH <sub>2</sub> PO <sub>4</sub>                   | 250                        | 68                                   |
| NaHCO <sub>3</sub>                                | 250                        | 84                                   |
| NaCl                                              | 250                        | 117                                  |
| MgCl <sub>2</sub> (H <sub>2</sub> O) <sub>6</sub> | 100                        | 30.5                                 |
| (NH <sub>4</sub> ) <sub>2</sub> CO <sub>3</sub>   | 100                        | 48                                   |
| CaCl <sub>2</sub> (H <sub>2</sub> O) <sub>2</sub> | 100                        | 43.8 (0.3 mol/L)                     |

Supplementary table 2 The components of SGF and SIF<sup>a</sup>

| Form                                                           | Stock conc. (mol/L) | SGF (pH = 3)       |                       | SIF (pH = 7)       |                       |
|----------------------------------------------------------------|---------------------|--------------------|-----------------------|--------------------|-----------------------|
|                                                                |                     | Vol. of stock (mL) | Conc. in SGF (mmol/L) | Vol. of stock (mL) | Conc. in SIF (mmol/L) |
| KCl                                                            | 0.50                | 17.50              | 6.90                  | 13.60              | 6.80                  |
| KH <sub>2</sub> PO <sub>4</sub>                                | 0.50                | 2.25               | 0.90                  | 1.60               | 0.80                  |
| NaHCO <sub>3</sub>                                             | 1.00                | 31.25              | 25.00                 | 85.00              | 85.00                 |
| NaCl                                                           | 2.00                | 29.50              | 47.20                 | 19.20              | 38.40                 |
| MgCl <sub>2</sub> (H <sub>2</sub> O) <sub>6</sub>              | 0.15                | 1.00               | 0.10                  | 2.20               | 0.33                  |
| (NH <sub>4</sub> ) <sub>2</sub> CO <sub>3</sub>                | 0.50                | 1.25               | 0.50                  | -                  | -                     |
| CaCl <sub>2</sub> (H <sub>2</sub> O) <sub>2</sub> <sup>b</sup> | 0.30                | -                  | 1.50                  | -                  | 0.60                  |

a) The composition and configuration of the simulated digestion solution were shown in the international convention, and the final constant volume was 1000 mL.

b) In order to prevent calcium precipitation, CaCl<sub>2</sub>(H<sub>2</sub>O)<sub>2</sub> was added before *in vitro* digestion.

Supplementary table 3 The primer's sequences for the genes

| Gene           | Forward (5'-3')          | Reverse (5'-3')          |
|----------------|--------------------------|--------------------------|
| G6Pase         | CTCTTTCCCATCTGGTTCCATCTT | GGAGCTGTTGCTGTAGTAGTCGG  |
|                | A                        |                          |
| Gck            | AGGAGGCCAGTGTAAGATGT     | CTCCCAGGTCTAAGGAGAGAAA   |
| Glut4          | CCATTCCCTGGTTCATTGTG     | ACGGCAAAT AGAAGGAAGAC    |
| IRS-1          | GGTTGCAGGCCAGTTGTTG      | CTGGTGCAGCACTGATCTAC     |
| PPAR $\alpha$  | AGAGCCCCATCTGTCCTCTC     | ACTGGTAGTCTGCAAAAACCAAA  |
| GK             | ATGTCGCTTTCCAACAAGCTG    | GCTCCATTGTCCAAGCAGAAT    |
| Serbp1c        | GCAGCCACCATCTAGCCTG      | CAGCAGTGAGTCTGCCTTGAT    |
| Fas            | ATGCTGTGGATCTGGGCTGTC    | CAGTTTCACGAACCCGCCTC     |
| Acc1           | GCACGTTCGATAGCACACCAC    | ATGGCATAACATCAATCTCTCTA  |
| Nrf2           | TCTTGGAGTAAGTCGAGAAGTGT  | GTTGAAACTGAGCGAAAAAGGC   |
| Gpx-1          | AGTCCACCGTGTATGCCTTCT    | GAGACGCGACATTCTCAATGA    |
| Ho-1           | AAGCCGAGAATGCTGAGTTCA    | GCCGTGTAGATATGGTACAAGGA  |
| CD14           | TAGACCTTAGTCACAATTCAC    | TTCCTATCCAGCCTGTTG       |
| ZO-1           | ACCCGAAACTGATGCTGTGGATA  | AAATGGCCGGGCAGAACTTGTGTA |
|                | G                        |                          |
| occludin       | TTGAAAGTCCACCTCCTTACAGA  | CCGGATAAAAAGAGTACGCTGG   |
| claudin3       | ACCAACTGCGTACAAGACGAG    | CAGAGCCGCCAACAGGAAA      |
| $\beta$ -actin | TGTCACCAACTGGGACGATA     | GGGGTGTGTAAGGTCTCAAA     |

## Detailed information of analysis of colonic flora profiles by 16S rDNA gene sequencing

Supplementary table 4 PCR amplification and 16S rDNA sequencing

| Region | Primers                                                              | Length of PCR product (bp) |
|--------|----------------------------------------------------------------------|----------------------------|
| V3-V4  | 341F (5'-CCTACGGGNGGCWGCAG-3')<br>805R (5'-GACTACHVGGGTATCTAATCC-3') | 465                        |

The 5' ends of the primers were tagged with specific barcodes per sample and sequencing with universal primers. PCR amplification was performed in a total volume of 25  $\mu$ L reaction mixture containing 25 ng of template DNA, 12.5  $\mu$ L 2 $\times$ PCR Premix, 1  $\mu$ L of each primer, and PCR-grade water to adjust the volume. The PCR conditions to amplify the prokaryotic 16S fragments consisted of an initial denaturation at 98  $^{\circ}$ C for 30 sec; 32 cycles of denaturation at 98  $^{\circ}$ C for 15 sec, annealing at 54 $^{\circ}$ C for 20 sec, and extension at 72  $^{\circ}$ C for 20 sec; and then final extension at 72  $^{\circ}$ C for 5 min. The PCR products were confirmed with 2% agarose gel electrophoresis. The amplicon pools were prepared for sequencing and the size and quantity of the amplicon library were assessed on Agilent 2100 Bioanalyzer (Agilent, USA) and with the Library Quantification Kit for Illumina (Kapa Biosciences, Woburn, MA, USA), respectively. The libraries were sequenced on NovaSeq PE250 platform.

### Data analysis

Samples were sequenced on an Illumina NovaSeq platform according to the manufacturer's recommendations, provided by LC-Bio. After dereplication using DADA2, we obtained feature table and feature sequence. Alpha diversity and beta diversity were calculated by normalized to the same sequences randomly. Then according to SILVA (release 132) classifier, feature abundance was normalized using relative abundance of each sample. Alpha diversity is applied in analyzing

complexity of species diversity for a sample through 5 indices, including Chao1, Observed species, Goods coverage, Shannon, Simpson, and all these indices were calculated with QIIME2. Beta diversity was also calculated by QIIME2. The feature sequences were annotated with SILVA database for each representative sequence. The diagrams were implemented using the R package (v3.5.2).
